# Supplementary material
Source: PubMed Central journal article supplement (PMC10337127)
Supplement: NIHMS1912114-supplement-Supp__Fig__1.pdf [file NIHMS1912114-supplement-Supp__Fig__1.pdf]

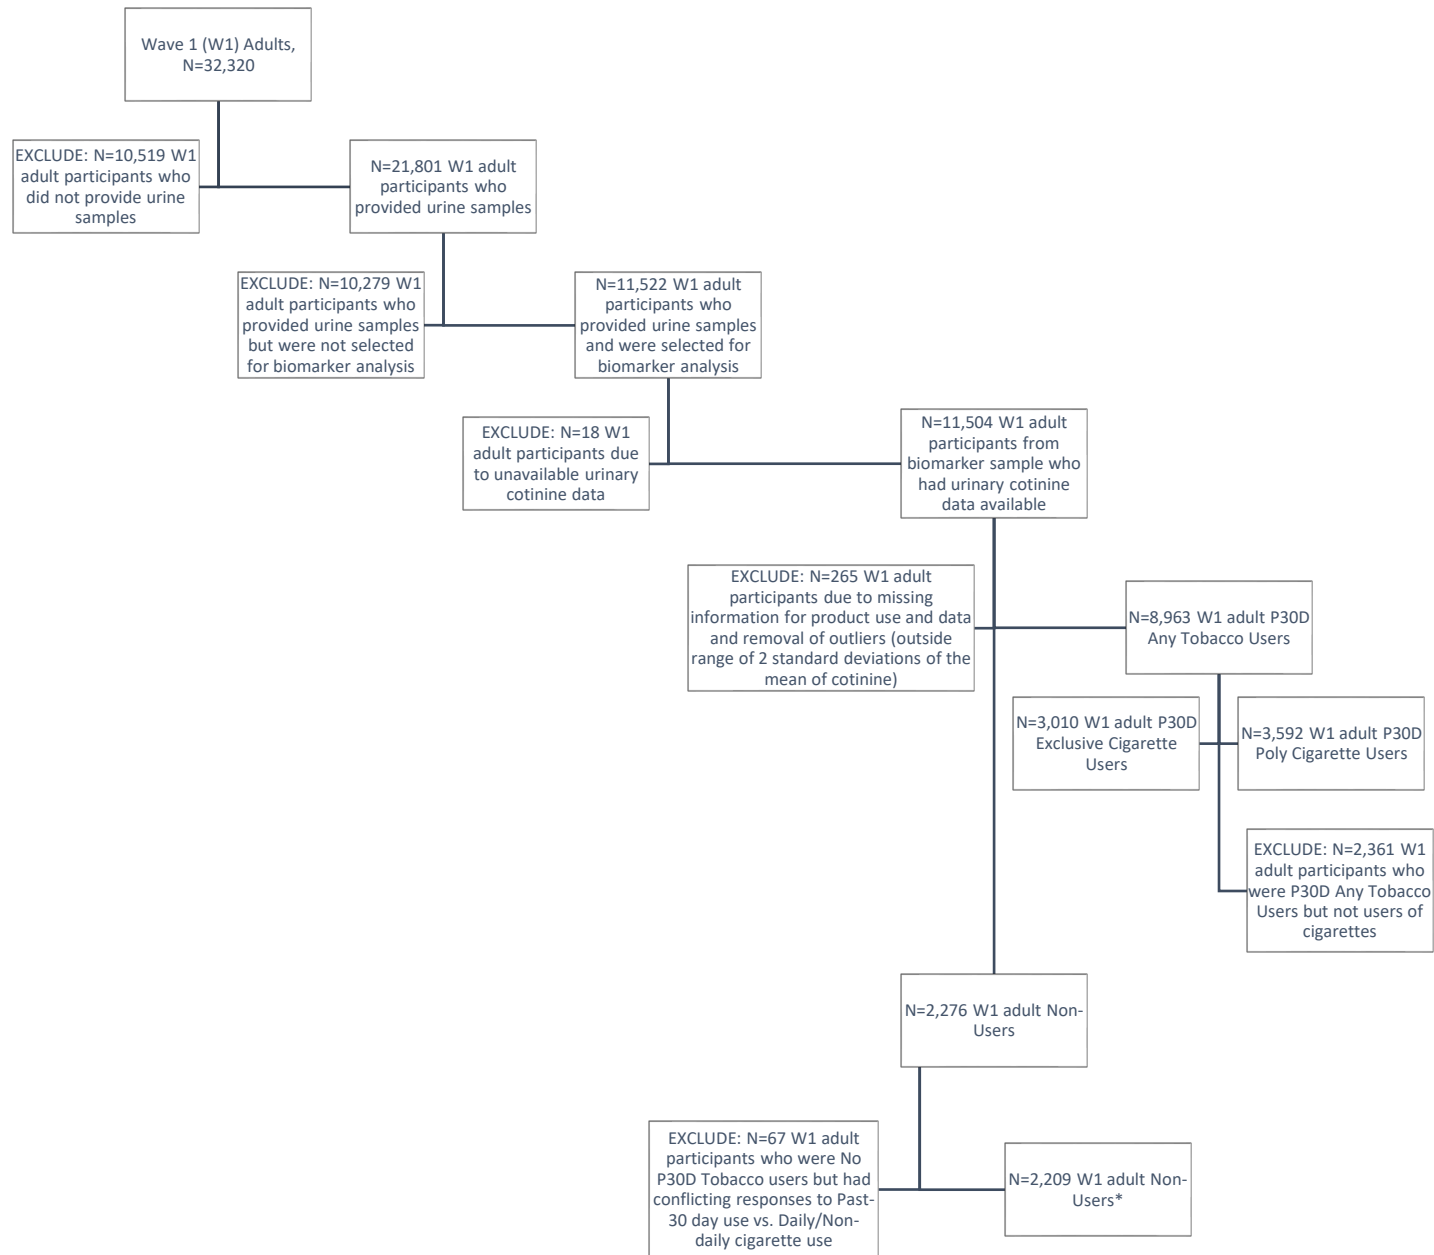

Supplemental Figure 1. Analytic Sample Determination. This flow diagram outlines exclusion criteria that led to our final analytic sample. All N's are unweighted. Abbreviations: P30D= past 30-days. \*This is the reference category for the exclusive or polytobacco cigarette use groups. Additional exclusion criteria was added to ensure logically consistent daily/non-daily cigarette use responses since we also stratified by daily/non-daily use for these analyses.
