# Supplementary material
Source: PubMed Central journal article supplement (PMC10337127)
Supplement: NIHMS1912114-supplement-Supp__Table_1.pdf [file NIHMS1912114-supplement-Supp__Table_1.pdf]

**Supplemental Table 1. Receiver Operating Curve (ROC) characteristics and optimal cut-point to distinguish past 30-day daily and non-daily cigarette users from non-users\*, overall and by sex and race/ethnicity.**

|                                                                                                | Unweighted N | Unweighted Denominator | CPM   | ROC Optimal Cut-point |               |               |      |              |              |
|------------------------------------------------------------------------------------------------|--------------|------------------------|-------|-----------------------|---------------|---------------|------|--------------|--------------|
|                                                                                                |              |                        |       | Cut-point (ng/mL)     | Sensitivity % | Specificity % | AUC  | 95% CI Lower | 95% CI Upper |
| <b>A. Past 30-Day Daily Exclusive Cigarette Use vs. No Past 30-Day/Non-Daily Cigarette Use</b> |              |                        |       |                       |               |               |      |              |              |
| <b>Overall</b>                                                                                 | 2394         | 4603                   | 299.6 | 144.0                 | 98.2%         | 98.9%         | 0.99 | 0.99         | 1.00         |
| <b>Sex</b>                                                                                     |              |                        |       |                       |               |               |      |              |              |
| Male                                                                                           | 1113         | 2016                   | 298.0 | 230.0                 | 97.1%         | 99.1%         | 0.99 | 0.98         | 1.00         |
| Female                                                                                         | 1281         | 2587                   | 302.1 | 88.6                  | 99.0%         | 99.0%         | 1.00 | 1.00         | 1.00         |
| <b>Race/Ethnicity</b>                                                                          |              |                        |       |                       |               |               |      |              |              |
| Non-Hispanic white                                                                             | 1630         | 2742                   | 353.2 | 170.0                 | 99.0%         | 99.5%         | 1.00 | 0.99         | 1.00         |
| Non-Hispanic black                                                                             | 340          | 739                    | 272.2 | 300.0                 | 97.4%         | 98.5%         | 0.99 | 0.98         | 1.00         |
| Non-Hispanic other race/multiple race                                                          | 160          | 349                    | 242.5 | 15.2                  | 100.0%        | 98.9%         | 1.00 | 1.00         | 1.00         |
| Hispanic                                                                                       | 264          | 773                    | 223.2 | 88.6                  | 93.8%         | 98.9%         | 0.97 | 0.93         | 1.00         |
| <b>B. Past 30-Day Non-Daily Exclusive Cigarette Use vs. No Past 30-Day Cigarette Use</b>       |              |                        |       |                       |               |               |      |              |              |
| <b>Overall</b>                                                                                 | 655          | 2864                   | 53.1  | 4.8                   | 83.6%         | 91.6%         | 0.93 | 0.91         | 0.95         |
| <b>Sex</b>                                                                                     |              |                        |       |                       |               |               |      |              |              |
| Male                                                                                           | 317          | 1220                   | 58.3  | 5.6                   | 85.8%         | 93.9%         | 0.94 | 0.91         | 0.96         |
| Female                                                                                         | 338          | 1644                   | 47.7  | 1.3                   | 90.4%         | 82.4%         | 0.92 | 0.88         | 0.95         |
| <b>Race/Ethnicity</b>                                                                          |              |                        |       |                       |               |               |      |              |              |
| Non-Hispanic white                                                                             | 288          | 1400                   | 53.9  | 1.3                   | 92.9%         | 83.3%         | 0.94 | 0.92         | 0.96         |
| Non-Hispanic black                                                                             | 116          | 515                    | 67.7  | 44.2                  | 90.6%         | 94.7%         | 0.97 | 0.96         | 0.99         |
| Non-Hispanic other race/multiple race                                                          | 48           | 237                    | 31.6  | 5.2                   | 83.2%         | 97.6%         | 0.93 | 0.86         | 0.99         |
| Hispanic                                                                                       | 203          | 712                    | 48.0  | 5.5                   | 78.8%         | 95.2%         | 0.88 | 0.83         | 0.94         |
| <b>C. Past 30-Day Daily Poly Cigarette Use vs. No Past 30-Day/Non-Daily Cigarette Use</b>      |              |                        |       |                       |               |               |      |              |              |
| <b>Overall</b>                                                                                 | 2629         | 4838                   | 265.4 | 82.6                  | 98.5%         | 98.7%         | 1.00 | 1.00         | 1.00         |
| <b>Sex</b>                                                                                     |              |                        |       |                       |               |               |      |              |              |
| Male                                                                                           | 1575         | 2478                   | 286.9 | 259.0                 | 97.7%         | 99.2%         | 1.00 | 0.99         | 1.00         |
| Female                                                                                         | 1054         | 2360                   | 234.1 | 82.6                  | 98.8%         | 99.0%         | 1.00 | 1.00         | 1.00         |

|                                                                                     |      |      |       |       |       |       |      |      |      |
|-------------------------------------------------------------------------------------|------|------|-------|-------|-------|-------|------|------|------|
| <b>Race/Ethnicity</b>                                                               |      |      |       |       |       |       |      |      |      |
| Non-Hispanic white                                                                  | 1706 | 2818 | 325.9 | 192.0 | 98.7% | 99.5% | 1.00 | 1.00 | 1.00 |
| Non-Hispanic black                                                                  | 384  | 783  | 214.4 | 259.0 | 96.8% | 98.0% | 1.00 | 0.99 | 1.00 |
| Non-Hispanic other race/multiple race                                               | 229  | 418  | 128.0 | 116.0 | 99.1% | 99.9% | 1.00 | 1.00 | 1.00 |
| Hispanic                                                                            | 310  | 819  | 233.7 | 60.3  | 97.6% | 98.7% | 0.99 | 0.98 | 1.00 |
| <b>D. Past 30-Day Non-Daily Poly Cigarette Use vs. No Past 30-Day Cigarette Use</b> |      |      |       |       |       |       |      |      |      |
| <b>Overall</b>                                                                      | 963  | 3172 | 55.0  | 7.4   | 85.0% | 93.5% | 0.95 | 0.94 | 0.96 |
| <b>Sex</b>                                                                          |      |      |       |       |       |       |      |      |      |
| Male                                                                                | 609  | 1512 | 52.4  | 7.5   | 87.4% | 94.9% | 0.96 | 0.95 | 0.97 |
| Female                                                                              | 354  | 1660 | 59.8  | 3.7   | 86.4% | 90.1% | 0.95 | 0.93 | 0.97 |
| <b>Race/Ethnicity</b>                                                               |      |      |       |       |       |       |      |      |      |
| Non-Hispanic white                                                                  | 478  | 1590 | 59.7  | 8.6   | 91.0% | 93.8% | 0.97 | 0.96 | 0.98 |
| Non-Hispanic black                                                                  | 153  | 552  | 61.2  | 39.1  | 89.9% | 94.4% | 0.97 | 0.95 | 0.99 |
| Non-Hispanic other race/multiple race                                               | 84   | 273  | 52.2  | 1.4   | 93.9% | 86.7% | 0.95 | 0.91 | 0.98 |
| Hispanic                                                                            | 248  | 757  | 40.5  | 3.0   | 80.7% | 89.4% | 0.91 | 0.87 | 0.94 |

Notes: CPM= Cigarettes per month; AUC= Area under the curve. CPM values were winsorized at 95% to adjust for outlier values (all values above 95th percentile were recoded as the value at the 95th percentile). Cotinine was log-transformed. Reference group observations with cotinine values that were outside of the range of 2 times the standard deviation of the mean of the reference groups were classified as outliers and removed from analysis. Cut-points based off Youden's J statistic. Analyses are weighted. \* When analyses were subset to daily cigarette use, the reference category was defined as those who did not report past 30-day use of any tobacco product other than cigarettes and reported current use of cigarettes on some days or not at all. When analyses were subset to non-daily cigarette use, the reference category was defined as those who did not report past 30-day use of any tobacco product and reported current use of cigarettes as not at all.
